# Supplementary material for: Chemical–genetic interaction mapping links carbon metabolism and cell wall structure to tuberculosis drug efficacy
Source: PubMed Central journal article supplement — Proc Natl Acad Sci U S A. 2022 Apr 5;119(15):e2201632119. doi: 10.1073/pnas.2201632119 (PMC9169745; doi:10.1073/pnas.2201632119), 2022-04-05
Supplement: pnas.2201632119.sapp.pdf [file pnas.2201632119.sapp.pdf]

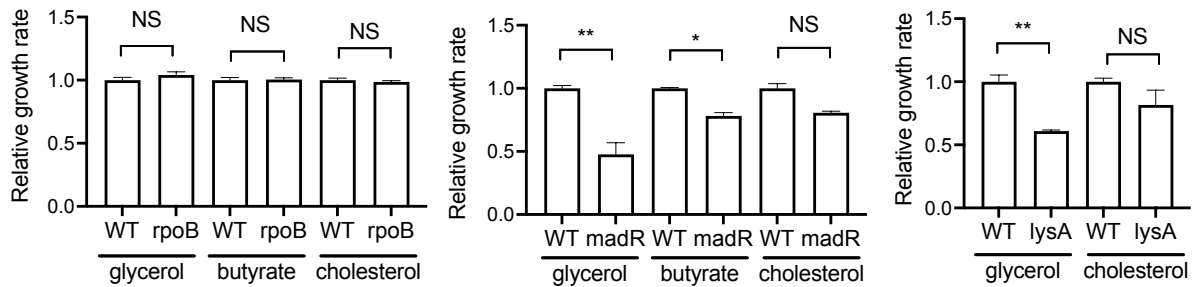

1

2 **Supplementary Figure 1. Relative growth rates of hypomorph mutants that show**

3 **condition-independent interactions with RIF.** Relative growth rates of WT and *rpoB*

4 **(left), *madR* (center), *lysA* (right)** hypomorph mutant during untreated growth in

5 respective carbon sources. Growth rate of hypomorph mutant was normalized to the

6 WT growth rate from the respective carbon source. Results shown as means from 3

7 biological replicates with standard deviations. Significance was calculated using

8 unpaired t-test, \* $p < 0.05$ , \*\* $p < 0.01$ , Not Significant (NS).

9

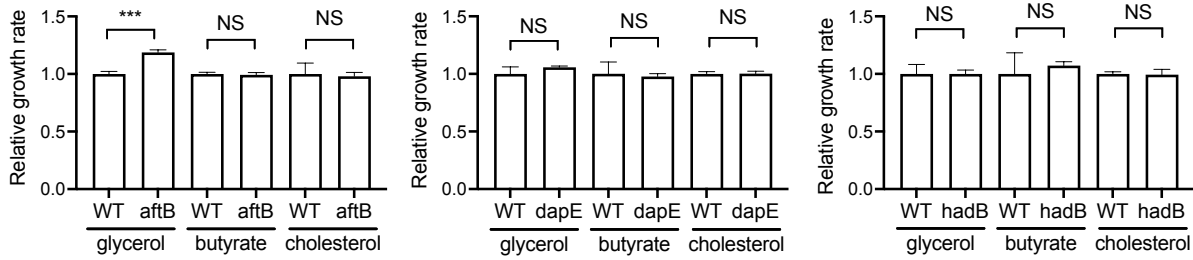

10

11 **Supplementary Figure 2. Relative growth rates of hypomorph mutants that show**

12 **condition-dependent interactions with RIF. Relative growth rates of WT and *aftB***

13 **(left), *dapE* (center), *hadB* (right) hypomorph mutant during untreated growth in**

14 **respective carbon sources. Growth rate of hypomorph mutant was normalized to the**

15 **WT growth rate from the respective carbon source. Results shown as means from 3**

16 **biological replicates with standard deviations. Significance was calculated using**

17 **unpaired t-test, \*\*\* $p < 0.001$ , Not Significant (NS).**

18

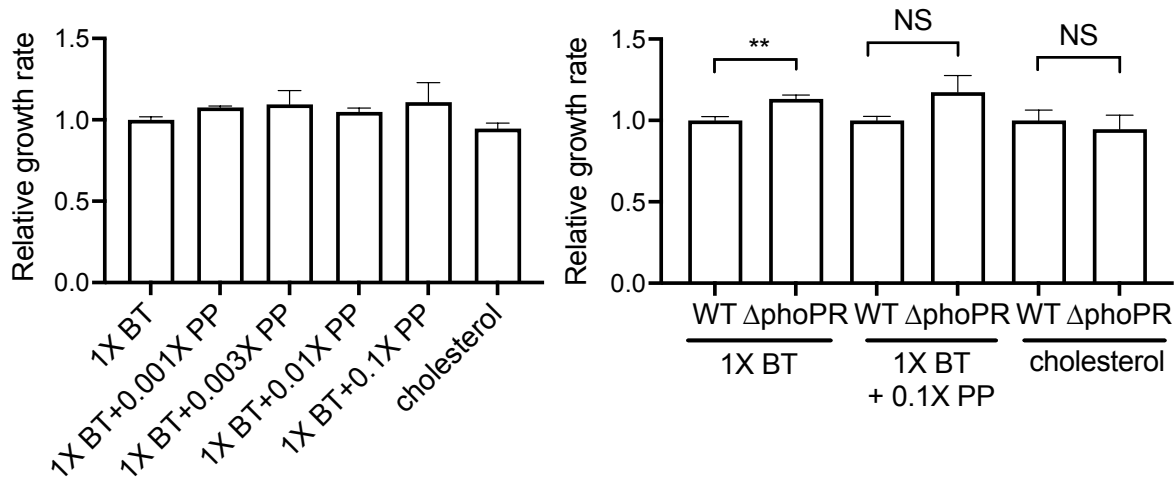

19

20 **Supplementary Figure 3. Relative growth rates of WT and  $\Delta phoPR$  mutant from**

21 **different carbon sources. (left)** Relative growth rates of WT during untreated growth in

22 different carbon sources. Growth rates of propionate supplemented conditions (PP) and

23 cholesterol were normalized to the butyrate (BT) growth rate. No significance was seen

24 between different conditions. Results shown as means from 3 biological replicates with

25 standard deviations. Significance was calculated using unpaired t-test. **(right)** Relative

26 growth rates of WT and  $\Delta phoPR$  mutant during untreated growth in respective carbon

27 sources. Growth rate of  $\Delta phoPR$  mutant was normalized to the WT growth rate from the

28 respective carbon source. Results shown as means from 3 biological replicates with

29 standard deviations. Significance was calculated using unpaired t-test, \*\* $p < 0.01$ , Not

30 Significant (NS).

31

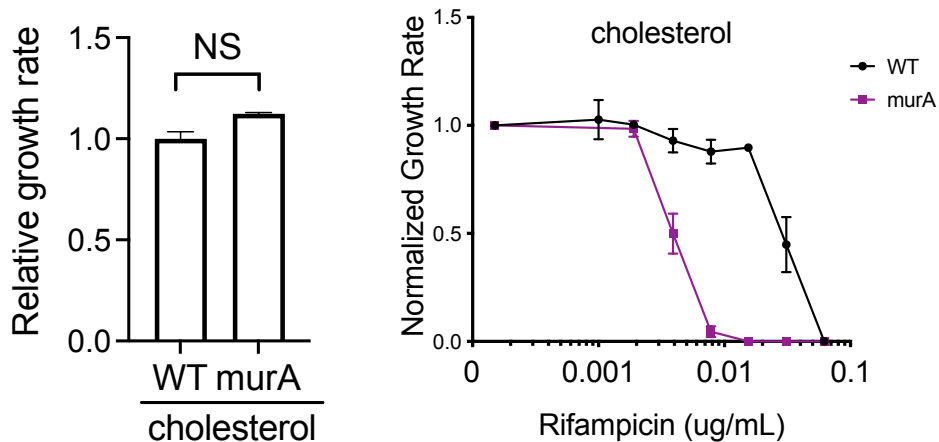

32

33 **Supplementary Figure 4. MurA hypomorph mutant shows altered RIF efficacy**

34 **during cholesterol growth conditions. (left)** Relative growth rates of WT and murA

35 hypomorph mutant during untreated growth in respective carbon sources. Growth rate

36 of hypomorph mutant was normalized to the WT growth rate from the respective carbon

37 source. Results shown as means from 3 biological replicates with standard deviations.

38 Significance was calculated using unpaired t-test, Not Significant (NS). **(right)**

39 Normalized growth inhibition of WT and MurA hypomorph mutant across increasing

40 concentrations of RIF in minimal media with cholesterol as the sole carbon source.

41 Depletion of MurA (purple) show decreased RIF MIC compared to WT (black) during

42 cholesterol growth conditions. Results shown as means from 3 biological replicates with

43 standard deviations.

44
